# Supplementary material for: Characterization and Biodegradation of Phenol by Pseudomonas aeruginosa and Klebsiella variicola Strains Isolated from Sewage Sludge and Their Effect on Soybean Seeds Germination
Source: MDPI journal article supplement (doi:10.3390/molecules28031203), 2023-01-26
Supplement: s1 [file s1]

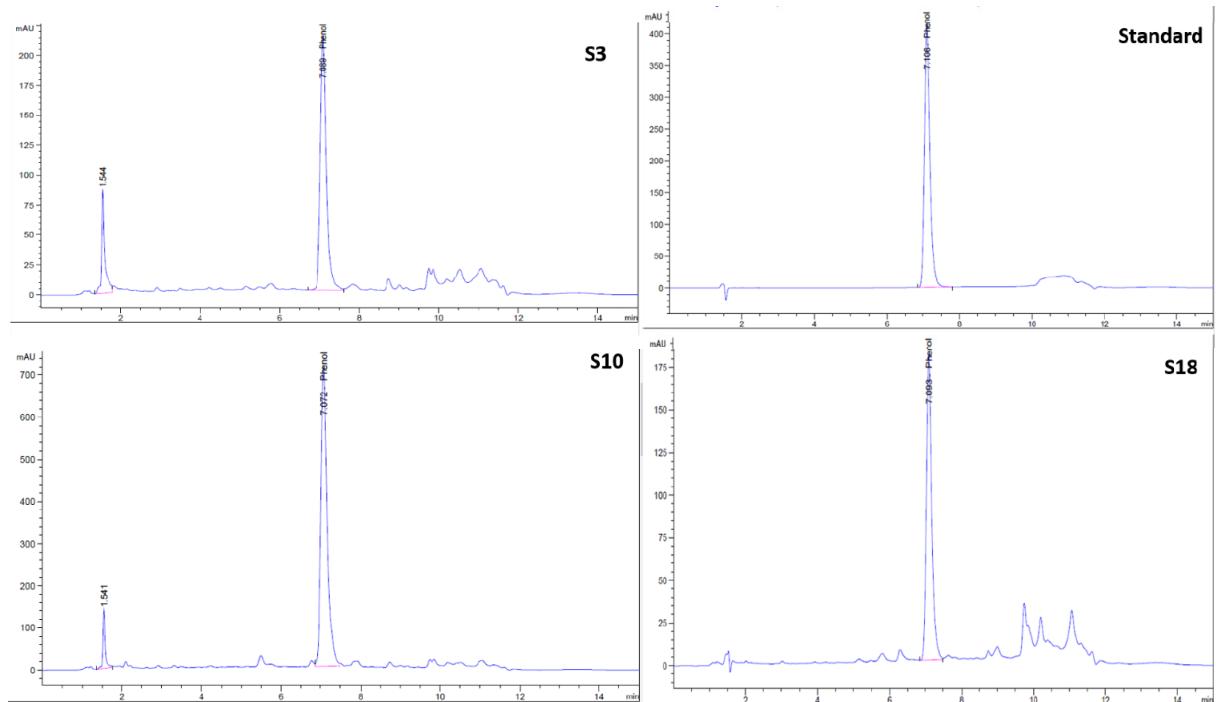

**Figure S1:** HPLC analysis for phenol-degrading bacterial strains of *Pseudomonas aeruginosa* (S3), *Klebsiella pneumoniae* (S10), and *Klebsiella variicola* (S18).
